# Supplementary material for: Misinformation making a disease outbreak worse: outcomes compared for influenza, monkeypox, and norovirus
Source: PubMed Central journal article supplement (PMC8282656; doi:10.1177/0037549719885021), 2020-04
Supplement: Simulation_S1.pdf [file Simulation_S1.pdf]

**Misinformation making a disease outbreak worse: Outcomes compared for influenza, monkeypox and norovirus, S1: Additional results for Influenza**

**ADDITIONAL RESULTS FOR INFLUENZA**

Results of exercise to find proportion of risk attributable to viral shedding.

| viralshedrisk | Mean TP | Mean r0 | duration (wks) | AR    | CFR    | maxill | # of iterations | r0min | r0max |
|---------------|---------|---------|----------------|-------|--------|--------|-----------------|-------|-------|
| 2.90%         | 50%     | 1.23695 | 13.8           | 42.1% | 0.639% | 8.6%   | 10              | 1.05  | 1.36  |
| 3.00%         | 50%     | 1.26338 | 15.9           | 45.2% | 0.581% | 8.9%   | 10              | 1.17  | 1.40  |
| 3.10%         | 50%     | 1.327   | 14.5           | 49.4% | 0.684% | 10.6%  | 10              | 1.11  | 1.50  |
| 3.20%         | 50%     | 1.31262 | 14.7           | 48.9% | 0.766% | 9.4%   | 10              | 1.16  | 1.43  |
| 3.30%         | 50%     | 1.38818 | 14.6           | 53.9% | 0.669% | 12.2%  | 30              | 1.17  | 1.61  |
| 3.40%         | 50%     | 1.42864 | 14.4           | 57.5% | 0.634% | 12.2%  | 30              | 1.32  | 1.53  |
| 3.50%         | 50%     | 1.45276 | 15.2           | 58.6% | 0.696% | 12.6%  | 100             | 1.24  | 1.61  |
| 3.60%         | 50%     | 1.45731 | 13.6           | 59.2% | 0.697% | 14.0%  | 100             | 1.27  | 1.58  |
| 3.70%         | 50%     | 1.5013  | 14.0           | 61.7% | 0.730% | 14.4%  | 100             | 1.30  | 1.64  |
| 3.80%         | 50%     | 1.53457 | 13.8           | 63.4% | 0.753% | 15.2%  | 100             | 1.34  | 1.70  |
| 3.90%         | 50%     | 1.5624  | 14.2           | 64.9% | 0.685% | 15.3%  | 100             | 1.35  | 1.72  |
| 4.00%         | 50%     | 1.6427  | 13.4           | 69.0% | 0.736% | 16.5%  | 30              | 1.48  | 1.77  |
| 4.10%         | 50%     | 1.6316  | 13.7           | 68.5% | 0.681% | 17.3%  | 30              | 1.43  | 1.78  |
| 4.20%         | 50%     | 1.64493 | 14.9           | 68.9% | 0.651% | 16.9%  | 30              | 1.48  | 1.79  |
| 4.30%         | 50%     | 1.66889 | 14.4           | 69.6% | 0.673% | 16.8%  | 10              | 1.41  | 1.86  |

Pink and Purple fill: Parameters that best met target objectives

TP: presumed mean % of time that exposed individuals take effective precautions to avoid disease.

r0: basic reproduction number

AR: Attack rate

CFR: Case fatality rate

maxill: Maximum number of persons ill at any one time

Other model assumptions as described in main text.

## Misinformation making a disease outbreak worse: Outcomes compared for influenza, monkeypox and norovirus, S1: Additional results for Influenza

Results of exercise to find change in taking precautions ( $\Delta TP$ ) that exacerbated outbreak using pre-specified indicators

| deltaTP | Mean r0  | medianr0 | r0 5%tile | r0 95%tile | duration (wks) | AR    | CFR   | Peak AR | # iterations |
|---------|----------|----------|-----------|------------|----------------|-------|-------|---------|--------------|
| 0.6%    | 1.8413   | 1.820487 | 1.61012   | 2.036392   | 15.4           | 76.4% | 0.49% | 15.5%   | 30           |
| 0.65%   | 1.847073 | 1.872104 | 1.628347  | 2.036083   | 16.2           | 76.3% | 0.53% | 14.5%   | 30           |
| 0.70%   | 1.897948 | 1.903299 | 1.75542   | 2.017648   | 15.1           | 78.3% | 0.55% | 17.5%   | 30           |
| 0.75%   | 1.940064 | 1.924411 | 1.705578  | 2.222077   | 14.9           | 79.2% | 0.57% | 17.4%   | 60           |
| 0.80%   | 1.9194   | 1.940195 | 1.633368  | 2.104002   | 14.7           | 78.5% | 0.58% | 17.4%   | 80           |
| 0.85%   | 1.986552 | 1.980394 | 1.703666  | 2.249744   | 14.7           | 80.3% | 0.57% | 17.9%   | 100          |
| 0.90%   | 1.99107  | 1.995705 | 1.738602  | 2.208379   | 14.6           | 80.6% | 0.60% | 17.2%   | 100          |
| 0.95%   | 2.025176 | 2.029149 | 1.724042  | 2.277316   | 15.0           | 81.5% | 0.57% | 18.2%   | 100          |
| 1.00%   | 2.033176 | 2.024844 | 1.858305  | 2.248283   | 14.2           | 81.8% | 0.56% | 18.4%   | 100          |
| 1.05%   | 2.078659 | 2.095103 | 1.781198  | 2.31627    | 14.9           | 82.7% | 0.62% | 18.2%   | 100          |
| 1.10%   | 2.080042 | 2.090032 | 1.7777    | 2.370871   | 14.0           | 82.8% | 0.54% | 18.4%   | 100          |
| 1.15%   | 2.102982 | 2.125724 | 1.860752  | 2.310989   | 13.9           | 83.3% | 0.57% | 18.9%   | 100          |
| 1.20%   | 2.127492 | 2.136538 | 1.850106  | 2.358577   | 13.2           | 83.9% | 0.60% | 19.7%   | 100          |
| 1.25%   | 2.159474 | 2.17899  | 1.87669   | 2.393012   | 13.6           | 84.4% | 0.58% | 19.3%   | 100          |
| 1.30%   | 2.187367 | 2.172252 | 1.958251  | 2.452679   | 13.4           | 85.0% | 0.48% | 20.1%   | 20           |
| 1.35%   | 2.218797 | 2.225172 | 2.018652  | 2.478924   | 13.4           | 85.6% | 0.62% | 19.5%   | 10           |
| 1.40%   | 2.220509 | 2.213158 | 2.047423  | 2.41053    | 13.4           | 85.8% | 0.58% | 19.7%   | 10           |
| 1.45%   | 2.271251 | 2.235715 | 2.105149  | 2.493754   | 13.6           | 86.7% | 0.61% | 19.8%   | 10           |

Pink or Purple fill: Parameters that best met target objectives

TP: presumed mean % of time that exposed individuals take effective precautions to avoid disease.

r0: basic reproduction number

AR: Attack rate

CFR: Case fatality rate

maxIll: Maximum number of persons ill at any one time

Other model assumptions as described in main text.

## Misinformation making a disease outbreak worse: Outcomes compared for influenza, monkeypox and norovirus, S1: Additional results for Influenza

Impacts on outbreak parameters from varying % of circulating advice that is bad advice.

| %BA    | Mean r0  | r0 5%tile | r0       |  | Duration<br>(wks) | Final AR | CFR   | Peak AR | # of<br>iterations |
|--------|----------|-----------|----------|--|-------------------|----------|-------|---------|--------------------|
|        |          |           | 95%tile  |  |                   |          |       |         |                    |
| 32.00% | 1.198539 | 1.079773  | 1.31704  |  | 9.9               | 39.6%    | 0.44% | 11.0%   | 10                 |
| 33.00% | 1.16735  | 1.085505  | 1.223602 |  | 10.2              | 36.8%    | 0.65% | 10.4%   | 10                 |
| 34.00% | 1.204356 | 1.009126  | 1.377533 |  | 9.9               | 39.7%    | 0.91% | 12.0%   | 10                 |
| 35.00% | 1.295781 | 1.19286   | 1.407595 |  | 10.9              | 47.8%    | 0.61% | 12.2%   | 10                 |
| 36.00% | 1.293564 | 1.161435  | 1.448734 |  | 11.6              | 47.4%    | 0.69% | 12.4%   | 100                |
| 37.00% | 1.330352 | 1.186886  | 1.484488 |  | 11.8              | 52.5%    | 0.67% | 12.9%   | 100                |
| 38.00% | 1.356305 | 1.207999  | 1.498873 |  | 12.3              | 52.5%    | 0.67% | 12.9%   | 100                |
| 39.00% | 1.393145 | 1.229517  | 1.54894  |  | 12.7              | 54.9%    | 0.70% | 13.5%   | 100                |
| 40.00% | 1.459654 | 1.265615  | 1.613018 |  | 14.4              | 59.0%    | 0.73% | 13.4%   | 100                |
| 41.00% | 1.514867 | 1.352087  | 1.685933 |  | 14.5              | 62.4%    | 0.69% | 13.8%   | 100                |
| 42.00% | 1.541547 | 1.390222  | 1.709729 |  | 14.2              | 63.9%    | 0.69% | 14.5%   | 100                |
| 43.00% | 1.728418 | 1.414188  | 1.91006  |  | 14.8              | 68.2%    | 0.70% | 15.1%   | 100                |
| 44.00% | 1.728418 | 1.414188  | 1.91006  |  | 12.3              | 71.9%    | 0.72% | 17.1%   | 10                 |
| 45.00% | 1.746742 | 1.655819  | 1.873223 |  | 14.7              | 73.2%    | 0.60% | 15.6%   | 10                 |
| 46.00% | 1.718664 | 1.586687  | 1.818247 |  | 14.9              | 72.5%    | 0.69% | 15.4%   | 10                 |
| 47.00% | 1.958176 | 1.804724  | 2.16928  |  | 15.7              | 80.0%    | 0.69% | 17.2%   | 10                 |
| 48.00% | 1.91463  | 1.767755  | 2.132593 |  | 13.6              | 78.6%    | 0.80% | 16.0%   | 10                 |
| 49.00% | 2.054574 | 1.746902  | 2.227619 |  | 13.6              | 82.1%    | 0.74% | 18.3%   | 10                 |
| 10.0%  | 0.877875 | 0.755375  | 0.993021 |  | 5.1               | 12.8%    | 0.74% | 5.0%    | 100                |

Pink or Purple fill: Parameters that best met target objectives

%BA: tested %s of total circulating advice that is bad advice

r0: basic reproduction number

AR: Attack rate

CFR: Case fatality rate

Other model assumptions as described in main text.

## Misinformation making a disease outbreak worse: Outcomes compared for influenza, monkeypox and norovirus, S1: Additional results for Influenza

Impacts on outbreak parameters from immunising specified %s of population against believing or circulating bad advice

| %imm  | Mean r0 | r0 5%tile | r0 95%tile | Duration (wks) | Final AR | CFR   | Peak AR | # of iterations |
|-------|---------|-----------|------------|----------------|----------|-------|---------|-----------------|
| 5.0%  | 1.912   | 1.675     | 2.091      | 14.2           | 78.5%    | 0.53% | 17.9%   | 10              |
| 7.5%  | 1.785   | 1.565     | 2.008      | 14.2           | 74.3%    | 0.47% | 17.3%   | 30              |
| 10.0% | 1.775   | 1.623     | 1.968      | 15.3           | 74.2%    | 0.48% | 16.3%   | 30              |
| 12.5% | 1.687   | 1.506     | 1.821      | 14.2           | 70.9%    | 0.49% | 15.8%   | 30              |
| 15.0% | 1.653   | 1.478     | 1.787      | 15.2           | 69.2%    | 0.44% | 14.8%   | 30              |
| 17.5% | 1.571   | 1.419     | 1.731      | 14.8           | 65.4%    | 0.42% | 14.4%   | 30              |
| 20.0% | 1.543   | 1.425     | 1.681      | 14.5           | 64.1%    | 0.46% | 14.2%   | 30              |
| 22.5% | 1.469   | 1.310     | 1.628      | 15.2           | 59.6%    | 0.42% | 13.1%   | 100             |
| 25.0% | 1.447   | 1.271     | 1.596      | 13.3           | 58.6%    | 0.39% | 14.5%   | 100             |
| 30.0% | 1.372   | 1.223     | 1.496      | 13.1           | 53.1%    | 0.43% | 13.1%   | 30              |
| 35.0% | 1.279   | 1.150     | 1.395      | 13.9           | 46.4%    | 0.29% | 10.8%   | 30              |
| 40.0% | 1.233   | 1.124     | 1.364      | 11.0           | 42.6%    | 0.29% | 11.4%   | 30              |
| 45.0% | 1.207   | 1.053     | 1.334      | 10.8           | 40.2%    | 0.27% | 11.0%   | 30              |
| 50.0% | 1.151   | 1.063     | 1.254      | 10.5           | 35.3%    | 0.21% | 10.1%   | 30              |
| 60.0% | 1.122   | 0.988     | 1.226      | 9.4            | 32.3%    | 0.24% | 9.3%    | 30              |
| 70.0% | 1.059   | 0.950     | 1.149      | 8.3            | 26.3%    | 0.15% | 8.2%    | 30              |
| 80.0% | 1.017   | 0.872     | 1.137      | 7.4            | 23.1%    | 0.18% | 7.6%    | 30              |
| 90.0% | 1.013   | 0.881     | 1.126      | 7.0            | 22.4%    | 0.15% | 7.5%    | 100             |

Pink or Purple fill: Parameters that best met target objectives

%imm: %s of population 'immunised' so that they neither believe nor share bad advice

r0: basic reproduction number

AR: Attack rate

CFR: Case fatality rate

Other model assumptions as described in main text.
