# Supplementary material for: Misinformation making a disease outbreak worse: outcomes compared for influenza, monkeypox, and norovirus
Source: PubMed Central journal article supplement (PMC8282656; doi:10.1177/0037549719885021), 2020-04
Supplement: Simulation_S2.pdf [file Simulation_S2.pdf]

## Misinformation making a disease outbreak worse: Outcomes compared for influenza, monkeypox and norovirus, S2: Additional results for Monkeypox

### ADDITIONAL RESULTS FOR MONKEYPOX

Results of exercise to find proportion of risk attributable to viral shedding.

| Viral shed risk | maxGens (75th centile) | r0   | Duration (wks) | AR   | CFR    | maxill | # of iterations | gens.5th | gens.95th |
|-----------------|------------------------|------|----------------|------|--------|--------|-----------------|----------|-----------|
| 0.10%           | 1.00                   | 0.01 | 3.1            | 1.0% | 1.274% | 0.97%  | 10              | 1.0      | 2.0       |
| 0.20%           | 1.75                   | 0.03 | 3.8            | 1.2% | 0.541% | 1.11%  | 10              | 1.0      | 2.6       |
| 0.30%           | 1.75                   | 0.02 | 3.8            | 1.1% | 0.565% | 1.08%  | 10              | 1.0      | 2.6       |
| 0.40%           | 2.00                   | 0.06 | 4.8            | 1.2% | 1.604% | 1.08%  | 10              | 1.0      | 3.0       |
| 0.50%           | 3.00                   | 0.10 | 5.4            | 1.1% | 0.749% | 0.99%  | 112             | 1.0      | 5.0       |
| 0.60%           | 3.00                   | 0.12 | 5.8            | 1.2% | 1.117% | 0.98%  | 150             | 1.0      | 5.0       |
| 0.70%           | 3.00                   | 0.13 | 6.4            | 1.2% | 0.779% | 0.99%  | 150             | 1.0      | 5.0       |
| 0.80%           | 4.00                   | 0.17 | 7.3            | 1.3% | 1.040% | 0.98%  | 160             | 1.0      | 8.0       |
| 0.90%           | 4.00                   | 0.22 | 8.1            | 1.4% | 1.122% | 1.01%  | 160             | 1.0      | 8.0       |
| 1.00%           | 6.00                   | 0.26 | 9.5            | 1.6% | 1.456% | 1.01%  | 160             | 1.0      | 10.0      |
| 1.10%           | 6.00                   | 0.27 | 9.9            | 1.7% | 1.375% | 1.02%  | 60              | 1.0      | 9.1       |
| 1.20%           | 7.00                   | 0.37 | 12.0           | 2.1% | 1.412% | 1.07%  | 60              | 1.0      | 11.1      |
| 1.30%           | 10.00                  | 0.39 | 13.3           | 2.3% | 1.674% | 1.06%  | 60              | 2.0      | 12.0      |
| 1.40%           | 8.00                   | 0.46 | 14.1           | 2.1% | 1.484% | 0.95%  | 10              | 1.9      | 10.6      |
| 1.50%           | 11.00                  | 0.46 | 15.1           | 3.4% | 1.487% | 1.25%  | 10              | 1.5      | 13.1      |
| 1.60%           | 7.50                   | 0.42 | 13.6           | 2.3% | 1.340% | 1.09%  | 10              | 2.5      | 11.6      |
| 1.70%           | 13.75                  | 0.70 | 22.2           | 5.7% | 2.093% | 1.56%  | 10              | 4.4      | 14.0      |

Pink and Purple fill: Parameters that best met target objectives

Viral shed risk: test % of total risk attributable to shedding virus (exclusive of other risk factors)

maxGens (75<sup>th</sup> centile): maximum number of generations, 75<sup>th</sup> percentile of all observed model runs

Purpose of this indicator is to find likely parameters when most observed outbreaks will have this maximum number of generations of transmission

TP (mean % of time that exposed individuals take effective precautions to avoid disease): 50% in all Stage 1 runs

r0: basic reproduction number

AR: Attack rate

CFR: Case fatality rate

maxIll: Maximum number of persons ill at any one time

gens.5<sup>th</sup>: 5<sup>th</sup> percentile, number of generations of transmission for all relevant iterations

gens 95<sup>th</sup>: 95<sup>th</sup> percentile of number of generations of transmission for all relevant iterations

Other model assumptions as described in main text.

## Misinformation making a disease outbreak worse: Outcomes compared for influenza, monkeypox and norovirus, S2: Additional results for Monkeypox

Results of exercise to find change in taking precautions ( $\Delta$ TP) that exacerbated outbreak using pre-specified indicators

| Delta TP | maxGens (75th centile) | Median # of Gens | r0   | Duration (wks) | AR   | CFR   | Peak AR | # of iterations |
|----------|------------------------|------------------|------|----------------|------|-------|---------|-----------------|
| 0.1%     | 3.0                    | 2                | 0.15 | 6.7            | 1.2% | 1.21% | 1.0%    | 50              |
| 0.2%     | 4.0                    | 3                | 0.22 | 8.5            | 1.4% | 1.26% | 0.0%    | 90              |
| 0.3%     | 4.0                    | 3                | 0.19 | 8.3            | 1.4% | 1.40% | 1.0%    | 90              |
| 0.4%     | 4.0                    | 2                | 0.20 | 8.5            | 1.5% | 1.39% | 1.0%    | 200             |
| 0.5%     | 5.0                    | 3                | 0.23 | 8.8            | 1.5% | 1.58% | 1.0%    | 201             |
| 0.6%     | 5.0                    | 3                | 0.23 | 9.8            | 1.8% | 1.42% | 1.1%    | 211             |
| 0.7%     | 5.0                    | 3                | 0.23 | 8.9            | 1.7% | 1.48% | 1.1%    | 211             |
| 0.8%     | 5.0                    | 3                | 0.26 | 9.5            | 1.8% | 1.35% | 1.1%    | 361             |
| 0.9%     | 5.0                    | 3                | 0.26 | 9.5            | 2.0% | 1.61% | 1.2%    | 470             |
| 1.0%     | 6.0                    | 3                | 0.28 | 9.8            | 2.1% | 1.37% | 1.1%    | 471             |
| 1.1%     | 7.0                    | 3                | 0.28 | 9.9            | 2.2% | 1.36% | 1.2%    | 680             |
| 1.2%     | 9.3                    | 3                | 0.32 | 10.5           | 2.5% | 1.55% | 1.3%    | 420             |
| 1.3%     | 10.0                   | 3                | 0.32 | 10.6           | 2.8% | 1.51% | 1.4%    | 241             |
| 1.4%     | 10.0                   | 3                | 0.32 | 10.5           | 2.8% | 1.42% | 1.4%    | 201             |
| 1.5%     | 11.0                   | 4                | 0.43 | 12.8           | 3.9% | 1.60% | 1.6%    | 50              |
| 1.6%     | 11.0                   | 2.5              | 0.38 | 11.8           | 3.3% | 1.70% | 1.5%    | 50              |
| 1.7%     | 11.0                   | 4                | 0.37 | 12.4           | 3.0% | 1.51% | 1.4%    | 50              |
| 1.8%     | 11.0                   | 5                | 0.46 | 14.1           | 3.6% | 1.20% | 1.5%    | 20              |

Pink or Purple fill: Parameters that best met target objectives

maxGens (75<sup>th</sup> centile): maximum number of generations, 75<sup>th</sup> percentile of all observed model runs  
 Purpose of this indicator is to find likely parameters when most observed outbreaks will have this maximum number of generations of transmission

TP: presumed mean % of time that exposed individuals take effective precautions to avoid disease.

Delta TP: candidate changes in TP with each exposure to good or bad advice

r0: basic reproduction number

AR: Attack rate

CFR: Case fatality rate

maxIll: Maximum number of persons ill at any one time

Other model assumptions as described in main text.

## Misinformation making a disease outbreak worse: Outcomes compared for influenza, monkeypox and norovirus, S2: Additional results for Monkeypox

Impacts on outbreak parameters from varying % of circulating advice that is bad advice.

| %BA   | maxGens<br>(75th<br>centile) | Median<br>Gens | r0   | Duration<br>(wks) | AR    | CFR   | Peak AR | # of<br>iterations |
|-------|------------------------------|----------------|------|-------------------|-------|-------|---------|--------------------|
| 10.0% | 3.00                         | 2              | 0.11 | 5.2               | 1.11% | 0.96% | 0.98%   | 100                |
| 20.0% | 3.00                         | 2              | 0.12 | 5.6               | 1.15% | 0.95% | 0.98%   | 40                 |
| 30.0% | 3.00                         | 2              | 0.13 | 5.9               | 1.15% | 0.95% | 0.98%   | 40                 |
| 31.0% | 3.00                         | 2              | 0.13 | 6.0               | 1.23% | 0.80% | 1.04%   | 70                 |
| 32.0% | 3.00                         | 2              | 0.14 | 6.0               | 1.22% | 1.17% | 1.03%   | 70                 |
| 33.0% | 3.00                         | 2.5            | 0.11 | 6.6               | 1.18% | 1.75% | 0.95%   | 70                 |
| 34.0% | 3.00                         | 2              | 0.11 | 5.7               | 1.13% | 1.51% | 0.97%   | 70                 |
| 35.0% | 3.25                         | 2              | 0.16 | 6.6               | 1.19% | 1.74% | 0.95%   | 100                |
| 36.0% | 4.00                         | 2              | 0.17 | 1.8               | 1.25% | 1.80% | 0.99%   | 225                |
| 37.0% | 4.00                         | 2              | 0.16 | 6.9               | 1.26% | 1.17% | 0.99%   | 225                |
| 38.0% | 4.00                         | 2              | 0.17 | 7.1               | 1.35% | 1.10% | 1.04%   | 195                |
| 39.0% | 4.00                         | 2              | 0.17 | 7.3               | 1.32% | 1.33% | 0.99%   | 328                |
| 40.0% | 4.00                         | 3              | 0.19 | 7.5               | 1.35% | 1.21% | 1.01%   | 203                |
| 41.0% | 4.00                         | 2              | 0.18 | 7.3               | 1.29% | 1.43% | 0.99%   | 203                |
| 42.0% | 4.00                         | 3              | 0.19 | 8.1               | 1.42% | 1.43% | 1.02%   | 203                |
| 43.0% | 5.00                         | 3              | 0.23 | 9.2               | 1.63% | 1.53% | 1.04%   | 203                |
| 44.0% | 5.00                         | 3              | 0.25 | 9.7               | 1.70% | 1.50% | 1.05%   | 201                |
| 45.0% | 5.00                         | 3              | 0.24 | 9.1               | 1.72% | 1.47% | 1.06%   | 203                |
| 46.0% | 5.00                         | 3              | 0.24 | 9.3               | 1.76% | 1.15% | 1.07%   | 300                |
| 47.0% | 6.00                         | 3              | 0.27 | 9.8               | 2.03% | 1.43% | 1.15%   | 401                |
| 48.0% | 9.00                         | 3              | 0.30 | 10.6              | 2.22% | 1.35% | 1.17%   | 500                |
| 49.0% | 9.00                         | 3              | 0.30 | 10.5              | 2.38% | 1.38% | 1.23%   | 501                |

Pink or Purple fill: Parameters that best met target objectives

%BA: tested %s of total circulating advice that is bad advice

r0: basic reproduction number

AR: Attack rate

CFR: Case fatality rate

Other model assumptions as described in main text.

## Misinformation making a disease outbreak worse: Outcomes compared for influenza, monkeypox and norovirus, S2: Additional results for Monkeypox

Impacts on outbreak parameters from immunising specified %s of population against believing or circulating bad advice

| imm%  | maxGens<br>(75th<br>centile) | Median #<br>of Gens | r0   | wks  | AR   | CFR   | Peak AR | # of<br>iterations |
|-------|------------------------------|---------------------|------|------|------|-------|---------|--------------------|
| 5.0%  | 7.0                          | 3                   | 0.29 | 10.1 | 2.2% | 1.56% | 1.17%   | 200                |
| 10.0% | 6.0                          | 3                   | 0.28 | 10.0 | 1.9% | 1.35% | 1.09%   | 300                |
| 15.0% | 5.0                          | 3                   | 0.24 | 9.2  | 1.7% | 0.00% | 1.06%   | 300                |
| 20.0% | 4.0                          | 3                   | 0.21 | 8.4  | 1.5% | 1.17% | 1.04%   | 300                |
| 25.0% | 4.0                          | 2                   | 0.18 | 7.6  | 1.3% | 1.12% | 0.98%   | 200                |
| 30.0% | 4.0                          | 2                   | 0.16 | 7.0  | 1.3% | 1.34% | 1.01%   | 200                |
| 35.0% | 4.0                          | 3                   | 0.16 | 6.9  | 1.3% | 0.86% | 1.02%   | 200                |
| 40.0% | 4.0                          | 2                   | 0.17 | 7.1  | 1.3% | 1.25% | 1.00%   | 200                |
| 45.0% | 3.0                          | 2                   | 0.13 | 5.9  | 1.2% | 1.13% | 0.98%   | 200                |
| 50.0% | 3.0                          | 2                   | 0.14 | 6.2  | 1.2% | 1.24% | 1.03%   | 70                 |
| 55.0% | 3.0                          | 2                   | 0.16 | 6.1  | 1.2% | 1.59% | 0.98%   | 70                 |
| 60.0% | 3.0                          | 2                   | 0.15 | 6.4  | 1.2% | 1.77% | 0.99%   | 70                 |
| 65.0% | 3.0                          | 2                   | 0.14 | 6.2  | 1.2% | 1.46% | 1.02%   | 70                 |
| 70.0% | 3.0                          | 2                   | 0.14 | 5.9  | 1.2% | 1.37% | 1.05%   | 70                 |
| 75.0% | 3.0                          | 2                   | 0.11 | 5.4  | 1.2% | 1.27% | 1.04%   | 70                 |
| 80.0% | 3.0                          | 2                   | 0.13 | 5.9  | 1.2% | 0.98% | 1.02%   | 70                 |
| 85.0% | 3.0                          | 2                   | 0.13 | 5.6  | 1.1% | 0.86% | 0.97%   | 70                 |
| 90.0% | 3.0                          | 2                   | 0.12 | 5.6  | 1.2% | 0.96% | 1.02%   | 200                |

Pink or Purple fill: Parameters that best met target objectives

%imm: %s of population 'immunised' so that they neither believe nor share bad advice

r0: basic reproduction number

AR: Attack rate

CFR: Case fatality rate

Other model assumptions as described in main text.
