# Supplementary material for: Misinformation making a disease outbreak worse: outcomes compared for influenza, monkeypox, and norovirus
Source: PubMed Central journal article supplement (PMC8282656; doi:10.1177/0037549719885021), 2020-04
Supplement: Simulation_S3.pdf [file Simulation_S3.pdf]

**Misinformation making a disease outbreak worse: Outcomes compared for influenza, monkeypox and norovirus, S3: Additional results for Norovirus**

**ADDITIONAL RESULTS FOR NOROVIRUS**

Results of exercise to find proportion of risk attributable to viral shedding.

| Viral shed risk | r0      | Duration (wks) | AR    | maxill | # of iterations | r0.5% | r0.95% |
|-----------------|---------|----------------|-------|--------|-----------------|-------|--------|
| 7.6%            | 1.80187 | 9.9            | 75.5% | 8.2%   | 40              | 1.67  | 1.91   |
| 7.7%            | 1.83601 | 10.0           | 76.5% | 8.2%   | 40              | 1.66  | 1.98   |
| 7.8%            | 1.83538 | 9.9            | 76.5% | 8.2%   | 40              | 1.70  | 1.97   |
| 7.9%            | 1.84607 | 9.9            | 76.9% | 8.2%   | 100             | 1.72  | 2.02   |
| 8.0%            | 1.84753 | 10.1           | 77.0% | 8.3%   | 100             | 1.70  | 1.99   |
| 8.1%            | 1.86388 | 10.2           | 77.4% | 8.5%   | 100             | 1.66  | 2.02   |
| 8.2%            | 1.87757 | 9.6            | 77.8% | 8.5%   | 100             | 1.71  | 2.05   |
| 8.3%            | 1.9025  | 9.4            | 78.6% | 8.6%   | 100             | 1.75  | 2.06   |
| 8.4%            | 1.93665 | 10.0           | 79.6% | 9.0%   | 100             | 1.78  | 2.08   |
| 8.5%            | 1.95214 | 9.4            | 80.1% | 9.1%   | 100             | 1.80  | 2.13   |
| 8.6%            | 1.95134 | 9.5            | 80.0% | 9.1%   | 100             | 1.76  | 2.09   |
| 8.7%            | 1.97349 | 9.4            | 80.6% | 9.2%   | 100             | 1.81  | 2.14   |
| 8.8%            | 1.979   | 9.1            | 80.7% | 9.3%   | 100             | 1.81  | 2.15   |
| 8.9%            | 2.00695 | 9.6            | 81.4% | 9.5%   | 100             | 1.83  | 2.18   |
| 9.0%            | 2.02719 | 9.2            | 81.9% | 9.3%   | 100             | 1.91  | 2.15   |
| 9.1%            | 2.03017 | 9.2            | 82.0% | 9.6%   | 100             | 1.88  | 2.18   |
| 9.2%            | 2.04248 | 9.0            | 82.3% | 9.3%   | 100             | 1.86  | 2.22   |
| 9.3%            | 2.06827 | 9.7            | 82.9% | 10.0%  | 40              | 1.90  | 2.21   |
| 9.4%            | 2.0771  | 9.0            | 83.2% | 10.0%  | 40              | 1.96  | 2.23   |

Pink and Purple fill: Parameters that best met target objectives

TP: preset to 50% at model start, presumed mean % of time that exposed individuals take effective precautions to avoid disease.

Viral shed risk: % of risk of transmission that is attributable to viral shedding alone

r0: basic reproduction number

AR: Attack rate

CFR: Case fatality rate

maxIll: Maximum number of persons ill at any one time

r0.5% & r0.95%: 5%tile & 95%tiles, r0 values across all iterations

Other model assumptions as described in main text.

**Misinformation making a disease outbreak worse: Outcomes compared for influenza, monkeypox and norovirus, S3: Additional results for Norovirus**

Results of exercise to find change in taking precautions ( $\Delta TP$ ) that exacerbated outbreak using pre-specified indicators

| Delta TP | Mean r0  | Median r0 | Duration (wks) | AR    | Peak AR | # of iterations |
|----------|----------|-----------|----------------|-------|---------|-----------------|
| 1.0%     | 2.278413 | 2.275761  | 9.1            | 86.9% | 10.0%   | 10              |
| 1.1%     | 2.291902 | 2.294312  | 9.4            | 87.2% | 10.3%   | 10              |
| 1.2%     | 2.391078 | 2.367117  | 9.5            | 88.7% | 10.9%   | 10              |
| 1.3%     | 2.478204 | 2.471386  | 9.9            | 89.8% | 9.7%    | 10              |
| 1.4%     | 2.497097 | 2.459727  | 9.7            | 90.1% | 10.3%   | 15              |
| 1.5%     | 2.538775 | 2.539404  | 9.1            | 90.5% | 10.3%   | 50              |
| 1.6%     | 2.547601 | 2.567571  | 8.9            | 90.7% | 10.7%   | 50              |
| 1.7%     | 2.568953 | 2.589749  | 9.2            | 90.9% | 10.6%   | 50              |
| 1.8%     | 2.604591 | 2.604230  | 8.7            | 91.2% | 10.6%   | 150             |
| 1.9%     | 2.654309 | 2.641084  | 8.7            | 91.8% | 10.7%   | 150             |
| 2.0%     | 2.681981 | 2.671089  | 8.9            | 92.0% | 10.8%   | 150             |
| 2.1%     | 2.673861 | 2.680948  | 8.5            | 92.0% | 11.2%   | 150             |
| 2.2%     | 2.717441 | 2.723774  | 8.2            | 92.4% | 11.2%   | 150             |
| 2.3%     | 2.78469  | 2.790031  | 9.1            | 93.0% | 11.6%   | 50              |
| 2.4%     | 2.771649 | 2.778416  | 8.3            | 92.8% | 11.5%   | 50              |
| 2.5%     | 2.815806 | 2.862887  | 8.7            | 93.2% | 10.8%   | 15              |
| 2.6%     | 2.837614 | 2.854453  | 8.0            | 93.3% | 11.9%   | 15              |
| 2.7%     | 2.885975 | 2.895646  | 8.7            | 93.8% | 11.4%   | 15              |

Pink or Purple fill: Parameters that best met target objectives

TP: presumed mean % of time that exposed individuals take effective precautions to avoid disease.

r0: basic reproduction number

AR: Attack rate

CFR: Case fatality rate

maxIll: Maximum number of persons ill at any one time

Other model assumptions as described in main text.

**Misinformation making a disease outbreak worse: Outcomes compared for influenza, monkeypox and norovirus, S3: Additional results for Norovirus**

Impacts on outbreak parameters from varying % of circulating advice that is bad advice.

| BA%    | Mean r0  | r0 5%tile | r0       |  | Duration<br>(wks) | AR    | Peak AR | # of<br>iterations |
|--------|----------|-----------|----------|--|-------------------|-------|---------|--------------------|
|        |          |           | 95%tile  |  |                   |       |         |                    |
| 10.00% | 0.993619 | 0.9515    | 1.028246 |  | 3.9               | 21.1% | 3.9%    | 5                  |
| 20.00% | 1.085581 | 1.027619  | 1.165515 |  | 5.0               | 28.7% | 4.2%    | 5                  |
| 31.00% | 1.381731 | 1.329291  | 1.43051  |  | 7.5               | 54.7% | 6.9%    | 5                  |
| 32.00% | 1.383598 | 1.24947   | 1.540855 |  | 8.1               | 53.4% | 5.7%    | 5                  |
| 33.00% | 1.446117 | 1.381129  | 1.576564 |  | 8.5               | 58.7% | 7.0%    | 5                  |
| 34.00% | 1.485713 | 1.350396  | 1.555341 |  | 7.7               | 61.2% | 7.4%    | 30                 |
| 35.00% | 1.541828 | 1.419516  | 1.68059  |  | 8.0               | 64.3% | 7.5%    | 30                 |
| 36.00% | 1.587118 | 1.479341  | 1.723975 |  | 8.0               | 66.5% | 7.9%    | 30                 |
| 37.00% | 1.637817 | 1.525191  | 1.763491 |  | 9.0               | 69.2% | 8.4%    | 30                 |
| 38.00% | 1.688556 | 1.515316  | 1.83599  |  | 9.2               | 71.1% | 8.2%    | 55                 |
| 39.00% | 1.765725 | 1.616062  | 1.922147 |  | 9.3               | 74.1% | 8.4%    | 100                |
| 40.00% | 1.856519 | 1.714502  | 2.001258 |  | 9.2               | 77.2% | 8.8%    | 100                |
| 41.00% | 1.924167 | 1.716357  | 2.072976 |  | 9.2               | 79.2% | 8.9%    | 100                |
| 42.00% | 1.995908 | 1.828731  | 2.142194 |  | 9.2               | 81.2% | 9.1%    | 100                |
| 43.00% | 2.061419 | 1.904316  | 2.239825 |  | 9.4               | 82.8% | 9.4%    | 55                 |
| 44.00% | 2.151153 | 2.039615  | 2.264968 |  | 9.3               | 84.6% | 9.3%    | 30                 |
| 45.00% | 2.207205 | 2.157404  | 2.268625 |  | 10.3              | 85.9% | 10.5%   | 5                  |
| 46.00% | 2.403756 | 2.327897  | 2.501688 |  | 9.2               | 89.0% | 9.9%    | 5                  |

Pink or Purple fill: Parameters that best met target objectives

%BA: tested %s of total circulating advice that is bad advice

r0: basic reproduction number

AR: Attack rate

CFR: Case fatality rate

Other model assumptions as described in main text.

## Misinformation making a disease outbreak worse: Outcomes compared for influenza, monkeypox and norovirus, S3: Additional results for Norovirus

Impacts on outbreak parameters from immunising specified %s of population against believing or circulating bad advice

| imm%  | Mean<br>r0 | r0<br>5%tile | r0<br>95%tile | Duration<br>(wks) | AR    | Peak AR | # of<br>iterations |
|-------|------------|--------------|---------------|-------------------|-------|---------|--------------------|
| 5.0%  | 2.4028     | 2.2255       | 2.5765        | 8.8               | 88.9% | 10.5%   | 20                 |
| 7.5%  | 2.2540     | 2.1037       | 2.3462        | 9.1               | 86.6% | 9.5%    | 20                 |
| 10.0% | 2.1821     | 2.0333       | 2.3354        | 9.7               | 85.3% | 9.5%    | 20                 |
| 12.5% | 2.0749     | 1.9571       | 2.1977        | 8.9               | 83.1% | 9.5%    | 80                 |
| 15.0% | 2.0347     | 1.8862       | 2.1949        | 9.5               | 82.1% | 9.3%    | 120                |
| 17.5% | 1.9289     | 1.7991       | 2.0677        | 9.2               | 79.5% | 8.9%    | 120                |
| 20.0% | 1.8939     | 1.7662       | 1.9850        | 9.3               | 78.5% | 8.9%    | 120                |
| 22.5% | 1.8180     | 1.6610       | 1.9371        | 9.9               | 76.0% | 8.6%    | 120                |
| 25.0% | 1.7675     | 1.6597       | 1.8837        | 9.5               | 74.4% | 8.5%    | 80                 |
| 30.0% | 1.6581     | 1.5766       | 1.7506        | 9.3               | 70.2% | 8.0%    | 20                 |
| 35.0% | 1.5674     | 1.4540       | 1.6411        | 8.9               | 65.9% | 7.6%    | 20                 |
| 40.0% | 1.4875     | 1.3682       | 1.5951        | 8.1               | 61.4% | 7.3%    | 20                 |
| 45.0% | 1.4226     | 1.3286       | 1.5185        | 8.6               | 57.4% | 7.1%    | 20                 |
| 50.0% | 1.3562     | 1.2280       | 1.4631        | 8.3               | 52.6% | 6.4%    | 20                 |
| 60.0% | 1.3056     | 1.1967       | 1.4109        | 6.8               | 48.7% | 6.3%    | 20                 |
| 70.0% | 1.1997     | 1.1460       | 1.2867        | 6.2               | 40.0% | 5.6%    | 20                 |
| 80.0% | 1.1549     | 1.0928       | 1.2111        | 5.6               | 35.7% | 5.3%    | 20                 |
| 90.0% | 1.1149     | 1.0273       | 1.2199        | 5.0               | 31.6% | 4.8%    | 120                |

Pink or Purple fill: Parameters that best met target objectives

%imm: %s of population 'immunised' so that they neither believe nor share bad advice

r0: basic reproduction number

AR: Attack rate

CFR: Case fatality rate

Other model assumptions as described in main text.
